# Supplementary material
Source: Springer Nature journal article supplement (https://www.springermedizin.de/resource/supplementary/12879_2005_355_MOESM3_ESM.pdf/9448846)

(A)

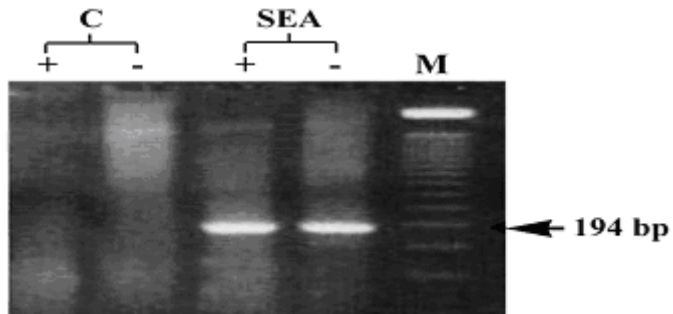

(B)

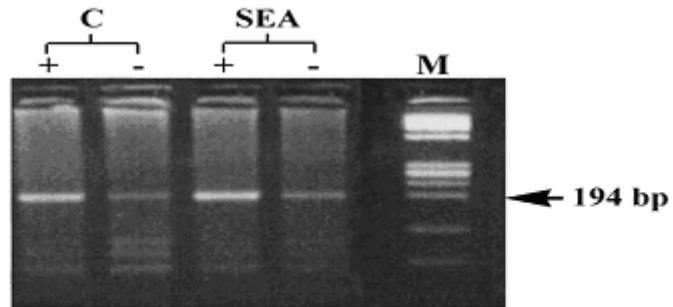

Supplement: MOESM3 [file 9448846]
